1 **Slc7a11 modulated by POU2F1 is involved in pigmentation in rabbit**

2 Yang Chen<sup>1,2</sup>, Shuaishuai Hu<sup>1</sup>, Lin Mu<sup>1</sup>, Bohao Zhao<sup>1</sup>, Manman Wang<sup>1</sup>, Naisu Yang<sup>1</sup>, Guolian  
3 Bao<sup>3</sup>, Cigen Zhu<sup>4</sup>, Xinsheng Wu<sup>1,2\*</sup>

4

5 <sup>1</sup>College of Animal Science and Technology, Yangzhou University, Yangzhou, Jiangsu, China

6 <sup>2</sup>Joint International Research Laboratory of Agriculture & Agri-Product Safety, Yangzhou  
7 University

8 <sup>3</sup>Animal Husbandry and Veterinary Research Institute, Zhejiang Academy of Agricultural  
9 Sciences, Hangzhou, Zhejiang, China.

10 <sup>4</sup>Jinling Rabbit Farm, Nanjing, Jiangsu, China

11

12 Short Title: Implication of Slc7a11 in pigmentation

13 \*Corresponding Author

14 Xinsheng Wu

15 College of Animal Science and Technology

16 Yangzhou University

17 48 South University Ave

Yangzhou, Jiangsu, 225009, P. R. China

18 Tel: 86 514 87997194

19 Fax: 86 514 87997194

20 E-mail: xswu@yzu.edu.cn

## Abstract

21 Solute carrier family 7 member 11 (Slc7a11) codes for a cystine/glutamate xCT transporter and  
22 can control production of pheomelanin pigment to change fur and skin colors of animals.  
23 Previous studies found that the skin expression levels of Slc7a11 varied significantly with the fur  
24 colors of the Rex Rabbit. However, it is not yet known the molecular regulation mechanism of  
25 Slc7a11 in pigmentation. Here rabbit melanocytes were first isolated and identified. The  
26 distribution and expression pattern of Slc7a11 was confirmed in rabbit skin with different fur  
27 colors. Slc7a11 could affect the expression of pigmentation related genes and thus affect  
28 melanogenesis. Meanwhile, Slc7a11 decreased melanocytes apoptosis, but inhibition of Slc7a11  
29 enhanced apoptosis. Furthermore, it was found that POU2F1 protein bound to the -713 to -703 bp  
30 region of Slc7a11 promoter to inhibit its activity by dual-luciferase reporter and site-directed  
31 mutagenesis assay. This study uncover the function of the Slc7a11 in melanogenesis and provided  
32 in-depth analysis of the mechanism of fur pigmentation.

33 Keywords : Rex Rabbit; melanocyte; pigmentation; Slc7a11; POU2F1

## 34 **Introduction**

35 The fur color of mammals mainly depends on melanin deposition, and melanogenesis is mainly  
36 regulated by melanocytes. The production of different types of melanin by melanocytes, together  
37 with different a distribution of these pigments, result in a variety of hair colors in mammals  
38 (Slominski et al., 2004). Related genes, such as TYR, TYRP1, ASIP, MITF, and CREB1, have  
39 been found to regulate melanin deposition (Hartman and Czyz, 2015; Hida et al., 2009).  
40 Previously, by using the transcriptome sequencing (RNA-Seq), a significant difference was found  
41 in the expression of the Slc7a11 gene in the skin of rabbits with different fur colors. It was  
42 speculated to be involved in fur pigmentation (Qin et al., 2016).

43 In the melanogenesis pathway, both eumelanin and pheomelanin are derived from a common  
44 precursor named dopaquinone (Ito, 2006). Cystine or glutathione is required for the production of  
45 pheomelanin, and it is xCT, the protein encoded by the Slc7a11 gene, that acts as a vector to  
46 transport extracellular cystine into the cell and maintain normal intracellular glutathione levels.  
47 Pheomelanin and eumelanin together form a mixed pigment that determines the skin and fur color  
48 of animals (Kim et al., 2001; Sato et al., 1999; Shih and Murphy, 2001). In the hair of Slc7a11  
49 gene-mutated mice (sut), the level of pheomelanin was significantly decreased, while the  
50 eumelanin level was substantially unchanged, so that the wild-type mice with yellow background  
51 appeared gray (Chintala et al., 2005). The sut mutation results in a huge deletion in the Slc7a11  
52 gene, but similar deletions could not be found in this region of Rex Rabbits with six different fur  
53 colors, namely black (BL), chinchilla (CH), white (WH), brown (BR), protein yellow (PY), and  
54 protein chinchilla (PC). SNPs in the exon region of Slc7a11 were also scanned, but no mutation  
55 site was found. This indicates that Slc7a11 is highly conserved in the population (data not shown).  
56 Currently, studies on the functions of Slc7a11 mainly focus on its important roles in cell  
57 proliferation (Liu et al., 2007), oxidative stress response (Bridges et al., 2001), and Alzheimer's  
58 disease target treatment (Qin et al., 2006). Research studying its regulatory mechanisms is  
59 focused on microRNAs affecting cancer development and apoptosis by targeting and regulating

60 Slc7a11 (Liu et al., 2007; Wu et al., 2017). Few studies regarding melanin deposition have been  
61 reported.

62 To explore the molecular regulation mechanism of Slc7a11 in the melanin deposition of Rex  
63 Rabbit fur, rabbit melanocytes were isolated and identified. The expression pattern of Slc7a11 in  
64 Rex Rabbit with different fur colors was analyzed. Further, it's verified that POU2F1 had an  
65 important regulatory role in the transcriptional activation of the Slc7a11 gene promoter. This  
66 result provides a theoretical basis for further analysis of the deposition mechanism of the fur  
67 pigmentation as well as for the transformation of fur color in animals.

## 68 **Materials and Methods**

### 69 **Primary separation and culture of rabbit melanocytes**

70 Rabbit was injected with anesthetic on the back, and a piece of the back skin (1.5 cm x 1.5 cm)  
71 was dissected. Any particles on the skin surface and subcutaneous connective tissue were  
72 removed. The skin sample was digested with 0.25% DispaseII enzyme digestion solution (Sigma)  
73 for 14-16 hours at 4 °C. The epidermis was gently peeled off from the dermis, cut into small  
74 pieces, and digested with 0.25% trypsin (Gibco) for 8 minutes at 37 °C. The sample was then  
75 filtered through a 200 mesh filter and the supernatant discarded. The cells were resuspended in  
76 M254 medium (Gibco) and incubated at 37°C in a 5% CO<sub>2</sub> incubator. The cells were digested  
77 with 1 mL of 0.25% trypsin and subcultured.

### 78 **DOPA staining**

79 Melanocytes in the logarithmic growth phase were used to prepare sterile cell culture slides. The  
80 inoculated 24-well plates were cultured for 3 days and treated with 1 mL of 4% paraformaldehyde  
81 fixative (Solarbio) for 30 minutes at 4°C. The plates were washed 3 times with pre-cooled PBS  
82 prior to the addition of L-DOPA (Sigma). After incubation in L-DOPA for 1 day, the incubation

83 solution was renewed and the plates were further incubated at 37 °C for 12 hours, with constant  
84 observation once every 30 min. The plates were washed with PBS once the staining was complete  
85 and observed under a microscope.

## 86 **Immunostaining**

87 Melanocytes in the logarithmic growth phase or skin tissues of Rex Rabbits with 6 different fur  
88 colors were used to prepare slides. The slides were incubated with primary antibodies Slc7a11  
89 (1:500 rabbit polyclonal, Abcam), S-100 (1:500 mouse monoclonal, Boster), TYRP1 (1:250  
90 rabbit polyclonal, Abcam), TYR (1:1000 rabbit polyclonal, Abcam) overnight at 4°C, with PBS as  
91 a negative control. The slides were subsequently incubated with IgG secondary antibody (1:2500  
92 goat polyclonal, Abcam) at 37°C for 20 minutes and developed for 3~5 minutes at room  
93 temperature in the dark with freshly prepared DAB solution (Boster). The slides were observed  
94 under a microscope.

## 95 **RACE and cloning of Slc7a11 gene**

96 Three specific 5' RACE primers and two 3' RACE primers were designed according to the Race  
97 kit instructions (Invitrogen & Clontech) (Table S1). The full-length cDNA sequence of the  
98 Slc7a11 gene was assembled based on known sequences and 5' and 3' RACE results, and  
99 submitted to NCBI (Accession no.: KY971639.1). The Slc7a11 cDNA was reconstructed into the  
100 pEGFP-N1 vector with restriction enzymes *HindIII* and *SacII*.

## 101 **Knockdown of Slc7a11 by siRNA**

102 Fluorescently labeled siRNAs (with 5' FAM modification) and Negative Control siRNAs were  
103 purchased from Shanghai GenePharma Co., Ltd (Table S2). When the melanocytes confluence  
104 reached about 65%, the siRNA oligo / Lipofectamine™ 2000 (Invitrogen) complex at a ratio of  
105 1:2 was prepared for transfection. After 24 hours, the transfection efficiency was examined by

106 fluorescence microscopy.

## 107 **Real-time PCR**

108 Real-time PCR was carried out using GAPDH as an internal reference. The fluorescent  
109 quantitative primers for the detection genes are shown in Table S3, and each sample was repeated  
110 3 times. The relative expression of the target gene was calculated by the  $\Delta\Delta\text{Ct}$  method; namely,  
111 the fold difference between the target gene and the reference gene (experimental group)/the fold  
112 difference between the target gene and the reference gene (control  
113 group) =  $2^{(\Delta\text{Ct}^{\text{experimental}} - \Delta\text{Ct}^{\text{control}})} = 2^{-\Delta\Delta\text{Ct}}$ .

## 114 **Simple Western analysis**

115 The pre-cooled RIPA lysis buffer (Sigma) was mixed with PMSF (with a final concentration of 1  
116 mM) and added to the tissue or cell samples, which were centrifuged at 10000 rpm for 5 minutes  
117 at 4°C. The supernatant was discarded and the total protein obtained. Simple Western analysis  
118 was performed using the Wes Simple Western (Protein Simple) system. The test results were  
119 analyzed using the Compass program.

## 120 **Apoptosis assay**

121 The cell apoptosis rate was measured with the Annexin V-FITC Apoptosis Detection Kit (Vazyme,  
122 China), according to the manufacturer's instructions. Cells were sorted by fluorescence-activated  
123 cell sorting using the Flow cytometer FACS Aria SORP (Becton Dickinson, USA).

## 124 **Determination of melanin level**

125 The cells were lysed with 1 mL 0.2 mol/L NaOH. The cell lysate was collected and incubated at  
126 37 °C for 2 hours. Wavelength measurement was performed at 475 nm using a microplate reader.

127 The standard curve was plotted using the Melanin synthetic standard (Sigma). Each group was  
128 repeated 3 times, from which the melanin level was calculated.

### 129 **Luciferase vector construction and reporter assays**

130 Promoter-specific primers were designed using Oligo7 (Table S4), and the Slc7a11 promoter  
131 region was analyzed using PROMO (<http://www.cbs.dtu.dk/services/Promoter/>) to obtain possible  
132 transcription factor binding sites. The Slc7a11 promoter was reconstructed into the pGL3-basic  
133 vector with restriction enzymes KpnI and BgIII. The internal reference plasmid pRL-TK and the  
134 recombinant plasmid were co-transfected into RAB-9 cells (ATCC), with the pGL3-basic plasmid  
135 and pRL-TK plasmid co-transfected cells as the negative control group and the cells with no  
136 substance transfected as the blank group. The transfected cells were collected and analyzed using  
137 the Dual-Luciferase Reporter Assay System (Promega).

### 138 **Electrophoresis mobility shift assay (EMSA)**

139 The nuclear proteins of melanocyte were extracted and the concentrations determined. Based on  
140 the binding sequence of POU2F1, normal and mutant probes were designed (Table S5) and  
141 biotinylated at the 5' end. The EMSA reaction system was formulated as shown in Table S6. The  
142 cold-competitive EMSA reaction system is shown in Table S7. The samples were analyzed by  
143 Native-PAGE, transferred, and UV cross-linked prior to carrying out the chemiluminescence  
144 reaction, development, and photographing.

### 145 **Statistical analysis**

146 Each experiment was repeated at least three times and statistical significance between  
147 experimental and control groups was analyzed by Independent-Sample Test and one-way ANOVA.  
148 The results are presented as mean  $\pm$  standard deviation (SD) at two levels of significance,  $P <$   
149 0.05 and  $P < 0.01$ .

## 150 **Results**

### 151 **Separation and identification of rabbit melanocytes**

152 The back skin of black Rex Rabbits was collected and cells separated by a two-step enzyme  
153 digestion method. After 12 hours of isolation, the keratinocytes were observed with a  
154 cobblestone-like appearance and accounted for the majority of cells. The melanocytes, which had  
155 the unique bi-polar dendritic morphology, were small in number. However, as cells grew, the  
156 keratinocytes gradually died out, the melanocytes continued to divide, and the cell culture became  
157 purer. When the cells were passed to the third generation, the keratinocytes were almost absent.  
158 The melanocytes were dominant with special growing follicles and strong refraction (Figure 1a).  
159 The melanocyte marker genes MITF, TYR, and TYRP1 were detected by semi-quantitative PCR  
160 (Figure 1b). The isolated cells stained with L-DOPA staining contained brown or black particles  
161 (Figure 1c). Immunocytochemical staining of S-100, TYR and TYRP1 revealed that the markers  
162 were expressed in the melanocytes. Compared with the negative control, S-100 staining showed  
163 the cytoplasm and dendrites were positively stained brown. The nucleus was brownish yellow in  
164 the TYR staining, and light brown in the TYRP1 staining (Figure 1d). This indicated that the  
165 rabbit melanocytes were successfully isolated and identified, providing experimental materials for  
166 this study.

### 167 **Analysis of Slc7a11 gene expression in Rex Rabbit skin with different fur** 168 **colors**

169 The Slc7a11 cDNA sequence, including 31 bp 5' UTR, 1509 bp open reading frame (ORF), and  
170 132 bp 3' UTRs (poly-[A] tail included), was obtained using RACE and cloning techniques and  
171 submitted to GenBank (Accession number KY971639.1) (Figure 2a). The localization of the  
172 Slc7a11 protein in the skin tissue of Rex Rabbits was determined by immunohistochemistry. Blue  
173 positive reactions were detected in the epidermis, hair bulbs, and hair root-sheaths, with different



174 shades of color, suggesting Slc7a11 was widely expressed (Figure 2b). It was found that the  
175 expression level of the Slc7a11 gene was highest in skin with PY color, which was 3.7 times that  
176 seen in WH. The differences between PY and WH, as well as between PC and WH, were  
177 significant ( $P<0.01$ ) (Figure 2c). Wes system analysis showed that the Slc7a11 protein was  
178 expressed in all skin tissues. The protein expression level was the highest in PY skin, and the  
179 lowest in the WH (Figure 2d). The expression levels of mRNA and protein of Slc7a11 in Rex  
180 Rabbit skin with different fur colors showed a significant positive correlation ( $R=0.874$ ,  $P<0.05$ ).

### 181 **Effect of Slc7a11 gene expression on melanin deposition**

182 In order to further analyze the mechanism of the Slc7a11 gene in melanogenesis, Slc7a11 siRNA  
183 interference and overexpression were performed in melanocytes, and RT-PCR and Wes were used  
184 to detect mRNA and protein expression levels of pigment-related genes such as MITF and TYR.  
185 The results showed that siRNA-2 and siRNA-3 interferences were significantly lower than that of  
186 the blank group ( $P<0.05$ ), and siRNA-3 had the best effect (Figure 3a, 3b). pEGFP-N1-Slc7a11  
187 was expressed in melanocytes and the expression of Slc7a11 was significantly increased ( $P<0.01$ )  
188 (Figure 4a, 4b).

189 When Slc7a11 was overexpressed or inhibited, the mRNA (Figure 3c, 4c) and protein expression  
190 levels (Figure 3d, 4d) of genes involved in the melanogenesis pathways (such as MITF, TYR,  
191 TYRP1, CREB1, and ASIP) also changed significantly. There was a significant positive  
192 correlation between mRNA and protein expression ( $P<0.05$ ), which was consistent with the  
193 changes in the expression of Slc7a11. Compared with the control group, the melanin level was  
194 increased when Slc7a11 was overexpressed; whereas when Slc7a11 was inhibited melanin level  
195 decreased (Figure 3e, 4e). The results suggested that Slc7a11 affects the expression of  
196 pigmentation-related genes such as TYR and MITF, and thus affects melanogenesis by  
197 melanocytes. We examined the apoptosis rate in melanocytes after transfecting with  
198 siRNA-Slc7a11 and pcDNA3.1- Slc7a11. It was found that Slc7a11 decreased melanocytes

199 apoptosis, but inhibition of Slc7a11 enhanced apoptosis (Figure 3f, 4f).

## 200 **Identification of the core region of the Slc7a11 promoter and key transcription** 201 **factor POU2F1**

202 In order to further reveal the regulatory mechanism of the Slc7a11 gene, the promoter sequence  
203 2499 bp before the start codon of Slc7a11 was cloned. Firstly, by predictive analysis of potential  
204 transcription factors in the Slc7a11 promoter region, four deletion vectors (P1~P4) were  
205 constructed. Dual-luciferase assays showed that the activities of P2 and P3 were comparable  
206 ( $P>0.05$ ). P2 activity was significantly lower than that of P1, and the activity of P4 was  
207 significantly lower than that of P3 ( $P<0.05$ ), indicating that the deletion of -969 ~ -469 bp and  
208 -2469 ~ -1969 bp decreased the activity significantly. The results suggested that there were two  
209 active regions in the Slc7a11 promoter, -969 ~ -469 bp and -2469 ~ -1969 bp, respectively (Figure  
210 5a).

211 In order to further identify the core transcription factor binding region, a series of deletion vectors  
212 were constructed targeting the -2469 ~ -1969 bp and -969 ~ -469 bp fragments: P8, P9, P10 for  
213 the -2469 ~ -1969 bp region, and P5, P6, and P7 for the -969 ~ -469 bp region. The activities of  
214 P8, P9, and P10 were similar by luciferase assay ( $P>0.05$ ) (Figure 5b). However, the activities of  
215 P5 and P6 were comparable but significantly lower than that of P7, indicating that the activity  
216 was significantly reduced with the deletion of the -769 to -619 bp region ( $P<0.05$ ) (Figure 5c),  
217 suggesting that -769 ~ -619 bp is the core transcription region of Slc7a11. The predicted POU2F1  
218 binding site (-713 to -703 bp) was found in the -769 to -619 bp region (Figure 5d). It was found  
219 that the promoter activity of Slc7a11 was significantly increased after the site-directed mutation  
220 ( $P<0.01$ ), indicating that POU2F1 inhibited the promoter activity of Slc7a11 (Figure 5e).

221 To further determine whether POU2F1 binds to this site of the Slc7a11 promoter, an EMSA  
222 experiment was performed using the nuclear protein of melanocytes (Figure 5f). The 3rd lane  
223 showed that the biotin-labeled probe of POU2F1 could bind to the nuclear protein to form a

224 complex band. No band in the 4th lane suggested that mutated POU2F1 could not bind to a  
225 nuclear protein to form a complex. The results together revealed that POU2F1 could bind to the  
226 Slc7a11 core promoter region. And a competitive EMSA experiment was performed to further  
227 determine whether the binding was specific (Figure 5g). A complex band in Lane 1 indicated that  
228 the probe was able to bind to the nuclear protein. The 2nd and 3rd lanes were cold-competitive  
229 reactions with unlabeled normal probes. No bands were observed, indicating that the unlabeled  
230 normal probes were competitively bound to the nuclear protein due to their large amounts,  
231 meaning the biotin-labeled probe could hardly bind to the protein. The 4th and 5th lanes were  
232 cold-competitive groups with unlabeled mutant probes. The unlabeled normal probe did not bind  
233 to the protein after mutation, and thus did not compete with the biotin-labeled normal probe,  
234 producing protein-probe complex bands. The results confirmed that the POU2F1 protein could  
235 bind to the -713 to -703 bp region and inhibit the activity of the Slc7a11 promoter.

## 236 **Discussion**

237 Fur color is controlled by different genes in the process of pigment biosynthesis. The differences  
238 in color are mainly due to the different ratios between pheomelanin (red and yellow) and  
239 eumelanin (black) (Barsh and Cotsarelis, 2007; Ito and Wakamatsu, 2008; Ito et al., 2000). The  
240 main model currently proposed is that the ratio of eumelanin/pheomelanin in mammalian  
241 pigments is solely or indirectly regulated by the activity of tyrosinase – the rate-limiting enzyme  
242 of melanin synthesis (Wagner et al., 2001). This model inferred that in the presence of low  
243 concentrations of tyrosinase, dopaquinone reacts with cysteine to produce cysteine dopa, thereby  
244 increasing the level of pheomelanin (Ito, 2003). However, this pattern is not yet fully understood.  
245 Studies have confirmed that the xCT transporter encoded by the Slc7a11 gene is crucial for the  
246 regulation of pigments and can directly affect the increase of pheomelanin (Chintala et al., 2005).  
247 Based on previous studies, Rex Rabbits with a variety of natural fur colors were used to explore  
248 the expression pattern of Slc7a11 gene in dorsal skin tissues with different fur colors. xCT was

249 expressed in the epidermis, hair bulb, and hair root-sheaths of the skin tissues examined by  
250 immunohistochemistry. It is known that melanocytes in the skin are often distributed in different  
251 regions when matured and that the only place where melanin can be supplied to the hair shaft is  
252 the hair bulb (Slominski et al., 2005; Tobin, 2011; Tobin et al., 1999). In this study, it was found  
253 that the expression sites of the *Slc7a11* gene were consistent with the distribution of melanin,  
254 suggesting that the protein was related to the formation of Rex Rabbit fur color. Moreover, the  
255 *Slc7a11* gene had the highest expression level in protein yellow coat, and the lowest level in  
256 white coat, by real-time quantitative and Wes system analyses. It is speculated that *Slc7a11*  
257 affects the formation of cystine, which is reduced to cysteine, and thus alters the production of  
258 pheomelanin. This is consistent with studies on alpaca and sheep (He et al., 2012; Tian et al.,  
259 2015). Knockdown and overexpression analyses of *Slc7a11* confirmed that this gene can affect  
260 the expression of *TYR*, *MITF*, *TYRP1*, and *ASIP* in the melanogenesis pathway (Gutierrez-Gil et  
261 al., 2007; Hida et al., 2009). Moreover, *Slc7a11* could decrease melanocytes apoptosis and further  
262 affect the melanogenesis of melanocytes. These results confirmed that *Slc7a11* is closely related  
263 to the formation of Rex Rabbit fur color. And the regulatory factors of such expression patterns  
264 would be the next research objective.

265 Chintala et al. found that the mouse light gray (*sut*) mutation was due to the inhibition of  
266 phaeomelanin production. It was caused by a large deletion of the *Slc7a11* gene starting from the  
267 11th intron crossing the 12th exon into the region adjacent to the *Pcdh18* gene. This resulted in a  
268 change in the 3' end of *Slc7a11* transcription (Chintala et al., 2005). Based on these results, the  
269 identification of similar deletions in the natural populations of Rex Rabbits with six fur colors  
270 was carried out. Unfortunately, no such large fragment deletions were found in similar areas.  
271 Exon scanning did not show any SNPs sites, indicating that *Slc7a11* is relatively conserved in the  
272 population. Similar results have been seen in humans and sheep (Gasol et al., 2004; He et al.,  
273 2012; Sato et al., 2000). The regulatory mechanism of *Slc7a11* is unknown.

274 Further, the promoter series deletion vector dual-luciferase was used to search for the -769 to -619

275 bp transcription core region of Slc7a11. And it's confirmed that POU2F1 protein binds to the -713  
276 to -703 bp region of the Slc7a11 promoter to inhibit its activity. POU2F1, also known as Octamer  
277 Transcription factor-1 (Oct-1), is a widely expressed POU protein factor. Recent studies suggest  
278 that it can regulate target genes associated with processes such as oxidation, anti-cytotoxicity,  
279 stem cell function, and cancer development, etc. (Maddox et al., 2012; Vazquez-Arreguin and  
280 Tantin, 2016). Ethanol has been reported to increase the expression of Slc7a11 by reducing the  
281 binding of POU2F1 to the Slc7a11 gene promoter (Lin et al., 2013). In this study, POU2F1 was  
282 found to specifically bind to the Slc7a11 promoter and inhibit its transcription. Together with the  
283 previous finding that Slc7a11 promotes melanin cytochrome deposition, POU2F1 can be used as  
284 a target for artificial modification of animal fur colors.

## 285 **Conclusions**

286 In summary, rabbit melanocytes were isolated and identified. The Slc7a11 expression levels in the  
287 protein yellow colored skin tissue was higher than those with other fur colors. It was verified that  
288 Slc7a11 could significantly affect the protein and mRNA expressions of TYR and MITF,  
289 inhibiting melanocytes apoptosis, thus affecting the melanogenesis by melanocytes. Further, it's  
290 confirmed that POU2F1 regulated the activity of the rabbit Slc7a11 promoter. Our results  
291 provided a theoretical basis for further exploration of the role Slc7a11 plays in pigmentation.

## 292 **Abbreviations**

293 Slc7a11 (Solute carrier family 7 member 11); POU2F1 (POU domain class 2 transcription factor  
294 1); RNA-Seq (transcriptome sequencing); BL (black); CH (chinchilla); WH (white); BR (brown);  
295 PY (protein yellow); PC (protein chinchilla); EMSA (Electrophoresis mobility shift assay); SD  
296 (standard deviation); ORF (open reading frame); Oct-1 (Octamer Transcription factor-1).

## 297 **Acknowledgements**

298 This work was supported by the Modern Agricultural Industrial System Special Funding  
299 (CARS-43-A-1), National Natural Science Foundation of China (Grant No. 31702081), and  
300 Science and Technology Major Project of New Variety Breeding (Livestock and Poultry) of  
301 Zhejiang Province, China (2016C02054-10).

### 302 **Statement of Ethics**

303 This study was carried out in accordance with the recommendations of Animal Care and Use  
304 Committee at Yangzhou University. The protocol was approved by the Animal Care and Use  
305 Committee at Yangzhou University.

### 306 **Disclosure Statement**

307 The authors have no conflicts of interest to declare.

### 308 **Author Contributions**

309 Yang Chen conceived and designed the experiments, performed the experiments, wrote the paper.  
310 Shuaishuai Hu performed the experiments. Lin Mu prepared figures and/or tables. Bohao Zhao  
311 analyzed the data. Manman Wang and Naisu Yang contributed reagents/materials/analysis tools.  
312 Guolian Bao and Cigen Zhu prepared figures and/or tables. Xincheng Wu conceived and designed  
313 the experiments, reviewed drafts of the paper.

314

## 315 **References**

- 316 **Barsh, G. and Cotsarelis, G.** (2007). How hair gets its pigment. *Cell* **130**, 779-781.
- 317 **Bridges, C. C., Kekuda, R., Wang, H. P., Prasad, P. D., Mehta, P., Huang, W.,**  
318 **Smith, S. B. and Ganapathy, V.** (2001). Structure, function, and regulation of human  
319 cystine/glutamate transporter in retinal pigment epithelial cells. *Investigative*  
320 *Ophthalmology & Visual Science* **42**, 47-54.
- 321 **Chintala, S., Li, W., Lamoreux, M. L., Ito, S., Wakamatsu, K., Sviderskaya, E. V.,**  
322 **Bennett, D. C., Park, Y. M., Gahl, W. A., Huizing, M. et al.** (2005). Slc7a11 gene  
323 controls production of pheomelanin pigment and proliferation of cultured cells.  
324 *Proceedings of the National Academy of Sciences of the United States of America* **102**,  
325 10964-10969.
- 326 **Gasol, E., Jimenez-Vidal, M., Chillaron, J., Zorzano, A. and Palacin, M.** (2004).  
327 Membrane topology of system x(c)(-) light subunit reveals a re-entrant loop with  
328 substrate-restricted accessibility. *Journal of Biological Chemistry* **279**, 31228-31236.
- 329 **Gutierrez-Gil, B., Wiener, P. and Williams, J. L.** (2007). Genetic effects on coat  
330 colour in cattle: dilution of eumelanin and pheomelanin pigments in an F2-Backcross  
331 Charolais x Holstein population. *BMC Genet* **8**.
- 332 **Hartman, M. L. and Czyz, M.** (2015). MITF in melanoma: mechanisms behind its  
333 expression and activity. *Cellular and Molecular Life Sciences* **72**, 1249-1260.
- 334 **He, X., Li, H. T., Zhou, Z. Y., Zhao, Z. S. and Li, W.** (2012). Production of  
335 Brown/Yellow Patches in the SLC7A11 Transgenic Sheep via Testicular Injection of  
336 Transgene. *Journal of Genetics and Genomics* **39**, 281-285.
- 337 **Hida, T., Wakamatsu, K., Sviderskaya, E. V., Donkin, A. J., Montoliu, L.,**  
338 **Lamoreux, M. L., Yu, B., Millhauser, G. L., Ito, S., Barsh, G. S. et al.** (2009). Agouti  
339 protein, mahogunin, and attractin in pheomelanogenesis and melanoblast-like alteration of  
340 melanocytes: a cAMP-independent pathway. *Pigment Cell & Melanoma Research* **22**,

341 623-634.

342 **Ito, S.** (2003). A chemist's view of melanogenesis. *Pigment Cell Research* **16**,  
343 230-236.

344 **Ito, S.** (2006). Encapsulation of a reactive core in neuromelanin. *Proceedings of the*  
345 *National Academy of Sciences of the United States of America* **103**, 14647-14648.

346 **Ito, S. and Wakamatsu, K.** (2008). Chemistry of mixed melanogenesis - Pivotal roles  
347 of dopaquinone. *Photochemistry and Photobiology* **84**, 582-592.

348 **Ito, S., Wakamatsu, K. and Ozeki, H.** (2000). Chemical analysis of melanins and its  
349 application to the study of the regulation of melanogenesis. *Pigment Cell Research* **13**,  
350 103-109.

351 **Kim, J. Y., Kanai, Y., Chairoungdua, A., Cha, S. H., Matsuo, H., Kim, D. K.,**  
352 **Inatomi, J., Sawa, H., Ida, Y. and Endou, H.** (2001). Human cystine/glutamate  
353 transporter: cDNA cloning and upregulation by oxidative stress in glioma cells. *Biochimica*  
354 *Et Biophysica Acta-Biomembranes* **1512**, 335-344.

355 **Lin, X. H., Yang, H., Zhang, H. F., Zhou, L. C. and Guo, Z. M.** (2013). A Novel  
356 Transcription Mechanism Activated by Ethanol INDUCTION OF Slc7a11 GENE  
357 EXPRESSION VIA INHIBITION OF THE DNA-BINDING ACTIVITY OF  
358 TRANSCRIPTIONAL REPRESSOR OCTAMER-BINDING TRANSCRIPTION  
359 FACTOR 1 (OCT-1). *Journal of Biological Chemistry* **288**, 14815-14823.

360 **Liu, R. R., Brown, C. E. and Murph, T. H.** (2007). Differential regulation of cell  
361 proliferation in neurogenic zones in mice lacking cystine transport by xCT. *Biochemical*  
362 *and Biophysical Research Communications* **364**, 528-533.

363 **Maddox, J., Shakya, A., South, S., Shelton, D., Andersen, J. N., Chidester, S.,**  
364 **Kang, J., Gligorich, K. M., Jones, D. A., Spangrude, G. J. et al.** (2012). Transcription  
365 Factor Oct1 Is a Somatic and Cancer Stem Cell Determinant. *Plos Genetics* **8**.

366 **Qin, L. Z., Wang, W. Z., Shi, L. J., Wan, X. Y., Yan, X. R., Weng, Q. Q. and Wu, X.**



367 **S.** (2016). Transcriptome expression profiling of fur color formation in domestic rabbits  
368 using Solexa sequencing. *Genetics and Molecular Research* **15**.

369 **Qin, S., Colin, C., Hanners, I., Gervais, A., Cheret, C. and Mallat, M.** (2006).  
370 System x(c)(-) and apolipoprotein e expressed by microglia have opposite effects on the  
371 neurotoxicity of amyloid-beta peptide 1-40. *Journal of Neuroscience* **26**, 3345-3356.

372 **Sato, H., Tamba, M., Ishii, T. and Bannai, S.** (1999). Cloning and expression of a  
373 plasma membrane cystine/glutamate exchange transporter composed of two distinct  
374 proteins. *Journal of Biological Chemistry* **274**, 11455-11458.

375 **Sato, H., Tamba, M., Kuriyama-Matsumura, K., Okuno, S. and Bannai, S.** (2000).  
376 Molecular Cloning and Expression of Human xCT, the Light Chain of Amino Acid  
377 Transport System x(c)(-). *Antioxidants & Redox Signaling* **2**, 665-672.

378 **Shih, A. Y. and Murphy, T. H.** (2001). xCT cystine transporter expression in  
379 HEK293 cells: Pharmacology and localization. *Biochemical and Biophysical Research*  
380 *Communications* **282**, 1132-1137.

381 **Slominski, A., Tobin, D. J., Shibahara, S. and Wortsman, J.** (2004). Melanin  
382 pigmentation in mammalian skin and its hormonal regulation. *Physiological Reviews* **84**,  
383 1155-1228.

384 **Slominski, A., Wortsman, J., Plonka, P. M., Schallreuter, K. U., Paus, R. and**  
385 **Tobin, D. J.** (2005). Hair follicle pigmentation. *Journal of Investigative Dermatology* **124**,  
386 13-21.

387 **Tian, X., Meng, X. L., Wang, L. Y., Song, Y. F., Zhang, D. L., Ji, Y. K., Li, X. J.**  
388 **and Dong, C. S.** (2015). Molecular cloning, mRNA expression and tissue distribution  
389 analysis of Slc7a11 gene in alpaca (*Lama paco*) skins associated with different coat colors.  
390 *Gene* **555**, 88-94.

391 **Tobin, D. J.** (2011). The cell biology of human hair follicle pigmentation. *Pigment*  
392 *Cell & Melanoma Research* **24**, 75-88.

393       **Tobin, D. J., Slominski, A., Botchkarev, V. and Paus, R.** (1999). The fate of hair  
394 follicle melanocytes during the hair growth cycle. *Journal of Investigative Dermatology*  
395 *Symposium Proceedings* **4**, 323-332.

396       **Vazquez-Arreguin, K. and Tantin, D.** (2016). The Oct1 transcription factor and  
397 epithelial malignancies: Old protein learns new tricks. *Biochimica Et Biophysica*  
398 *Acta-Gene Regulatory Mechanisms* **1859**, 792-804.

399       **Wagner, C. A., Lang, F. and Broer, S.** (2001). Function and structure of  
400 heterodimeric amino acid transporters. *American Journal of Physiology-Cell Physiology*  
401 **281**, C1077-C1093.

402       **Wu, Y. D., Sun, X. J., Song, B., Qiu, X. L. and Zhao, J. J.** (2017).  
403 MiR-375/SLC7A11 axis regulates oral squamous cell carcinoma proliferation and invasion.  
404 *Cancer Medicine* **6**, 1686-1697.

405

406

## 407 **Figure Legends**

408 **Fig. 1. The separation and identification of melanocytes of rabbits.** (a) Morphology of the 1<sup>st</sup>,  
409 3<sup>rd</sup>, 5<sup>th</sup>, and 7<sup>th</sup> generation melanocytes isolated by the two-step enzyme digestion method (100×).  
410 After 12 hours of isolation and culture, cobblestone-like keratinocytes and bi-polar dendritic  
411 melanocytes were observed. As the cells grew, the keratinocytes gradually metastasized while the  
412 melanocytes continued to divide, and the cell culture became more pure. (b) Identification of  
413 isolated rabbit melanocytes by L-DOPA staining. The 3<sup>rd</sup> generation melanocytes were treated  
414 with L-DOPA to detect the distribution of brown or black particles in isolated cells. (c) Real-time  
415 PCR was used to detect the expression of melanocyte-specific genes such as MITF, TYR, and  
416 TYRP1 in isolated cells. (d) Isolated rabbit melanocytes were identified by immunocytochemical  
417 staining (100×) using melanocyte-specific marker proteins S-100, TYR, and TYRP1 to analyze  
418 the expression pattern of these three proteins in the isolated cells.

419 **Fig. 2. Cloning of rabbit *Slc7a11* gene and its expression in Rex Rabbit coat with different**  
420 **fur colors.** (a) Full length sequence of rabbit *Slc7a11* cDNA was obtained using the RACE  
421 technique. The 5'UTR and 3'UTR sequences were obtained by 5' RACE and 3' RACE,  
422 respectively, and the DNASTAR program was used to assemble the sequence as well as remove  
423 redundant sequences to obtain the Rex Rabbit *Slc7a11* cDNA sequence. (b) Localization of  
424 *Slc7a11* in the skin of Rex Rabbits with different fur color using immunohistochemical staining.  
425 Arrows indicate positive expression of *Slc7a11* in the epidermis and hair follicles (×100). (c)  
426 mRNA expression level of *Slc7a11* gene in skin tissues of Rex Rabbits with different fur colors  
427 by Real-time PCR. (d) The expression level of *Slc7a11* (xCT) in skin tissues of Rex Rabbits with  
428 different fur colors by the Wes method. The results were analyzed using the Compass program  
429 and the relative expression ratio of *Slc7a11* was calculated.

430 **Fig. 3. Melanogenesis-related gene expression and melanogenesis were inhibited by *Slc7a11***  
431 **knockdown.** (a) Cell morphology 24 hours after transfection of melanocytes by FAM-siRNA.  
432 Melanocytes in the logarithmic growth phase were transfected and the transfection was detected

433 by the observation of green fluorescence. (b) Real-time PCR detection of *Slc7a11* mRNA  
434 expression after siRNA interference. The best siRNA was screened for subsequent experiments. (c)  
435 Effects of *Slc7a11* interference on the expression of pigmentation-related genes such as MITF,  
436 TYR, TYRP1, CREB1, and ASIP. (d) Detection of the expressions of MITF, TYR, and Slc7a11  
437 (xCT) proteins in melanocytes by Wes. The relative expression levels of MITF, TYR, and Slc7a11  
438 (xCT) proteins were calculated and analyzed by the Compass program. (e) The effect of *Slc7a11*  
439 knockdown on melanogenesis in melanocytes. Melanocytes were collected after siRNA-3  
440 transfection and the melanin level was measured using a microplate reader. (f) The melanocytes  
441 apoptosis rate was determined after the knockdown of Slc7a11.

442 **Fig. 4. The expression of melanogenesis-related genes and melanogenesis were increased by**  
443 **the overexpression of Slc7a11.** (a) Fluorescence detection results of pEGFP-N1-Slc7a11  
444 transfected melanocytes. pEGFP-N1 was used as a control. (b) Detection of the overexpression of  
445 *Slc7a11* in melanocytes by Real-time PCR. (c) The effect of *Slc7a11* overexpression on the  
446 expression of pigmentation-related genes such as MITF, TYR, TYRP1, CREB1, and ASIP. (d)  
447 Detection of the expressions of MITF, TYR, and Slc7a11 (xCT) proteins in melanocytes by Wes.  
448 The relative expression levels of MITF, TYR, and Slc7a11 (xCT) proteins were calculated and  
449 analyzed using the Compass program. (e) The effect of *Slc7a11* overexpression on melanogenesis  
450 in melanocytes. Melanocytes were collected after siRNA-3 transfection and the melanin level was  
451 measured using a microplate reader. (f) The melanocytes apoptosis rate was determined after the  
452 overexpression of Slc7a11.

453 **Fig. 5. Regulation of transcriptional factor POU2F1 on *Slc7a11* promoter activity.** (a)  
454 Preliminary analysis of the activity of Slc7a11 promoter-deleted vector series. P1~P4 were  
455 constructed and the activity of each fragment was detected using dual luciferase. It was presumed  
456 that the Slc7a11 promoter contained two active regions, namely -969~-469 bp and -2469~ -1969  
457 bp. (b) Activity detection of a series of vectors with deletions in the -969~-469 bp active region of  
458 Slc7a11 promoter. P5~P7 were designed and constructed for this region. (c) Activity detection of

459 a series of vectors with deletions in the -2469~-1969 bp active region of Slc7a11 promoter.  
460 P8~P10 were designed and constructed for this region. (d) Prediction of the transcriptional  
461 binding site in the Slc7a11 promoter region. The -769 to -619bp region was the primary target  
462 based on the results of (a), (b), and (c). The results also suggested that transcriptional repressors  
463 may be present in this region. The potential transcription factor binding sites were analyzed using  
464 the online program PROMO. (e) Site-directed mutagenesis analysis of POU2F1. Based on the  
465 predicted position given by PROMO, the POU2F1 binding site was effectively mutated by  
466 site-directed mutagenesis and detected by dual-luciferase assay. (f) EMSA suggested that  
467 POU2F1 could bind to the Slc7a11 core promoter region. The 1st and 2nd lanes were normal and  
468 blank mutant probes, respectively, and no bands indicated good probes. The 3rd and 4th lanes  
469 were biotin-labeled normal and mutation probes, respectively. The 5th and 6th lanes were NF-KB  
470 positive and negative controls, respectively. NSB stands for non-specific binding. (g) Specific  
471 binding of POU2F1 to the Slc7a11 core promoter region by competitive EMSA experiments. In  
472 2nd and 4th lanes, unlabeled probes were 40 times that of the labeled probes, and in 3rd and 5th,  
473 unlabeled probes were 80 times that of the labeled probes.

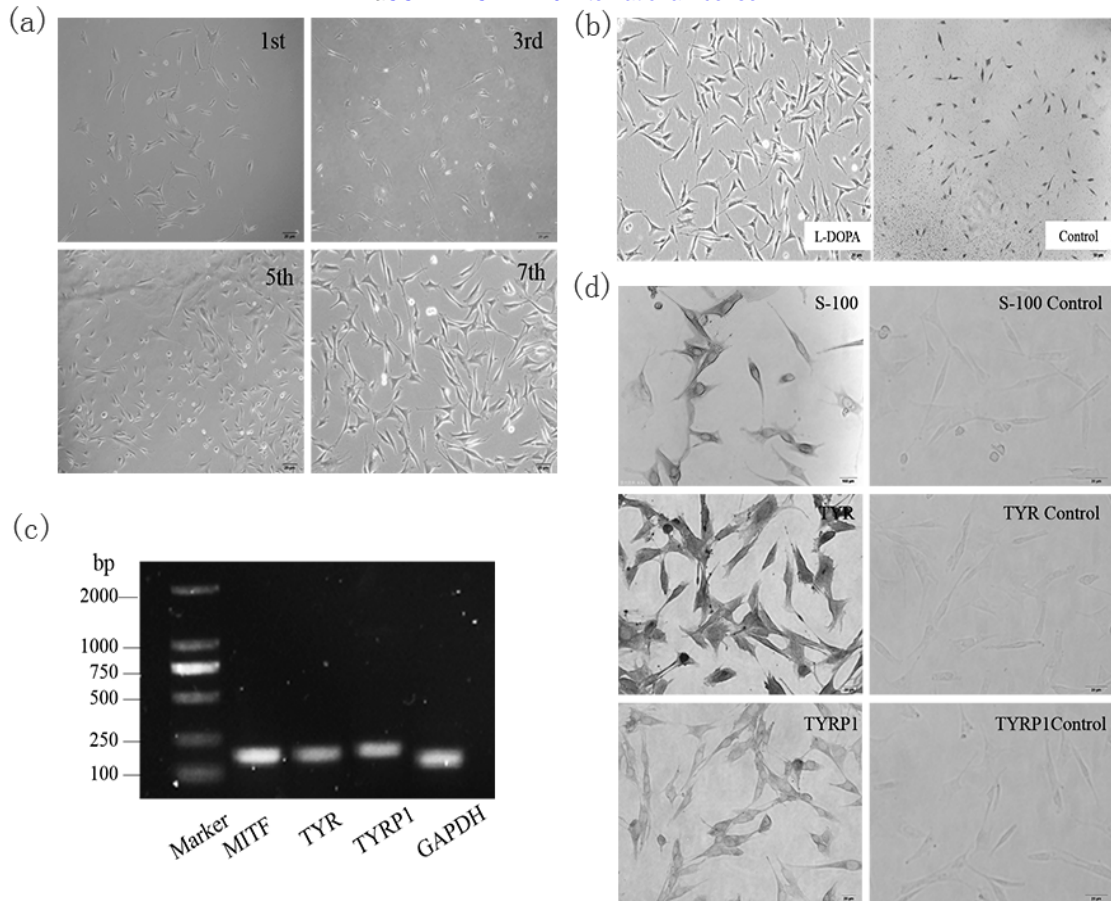

**Fig. 1. The separation and identification of melanocytes of rabbits.**

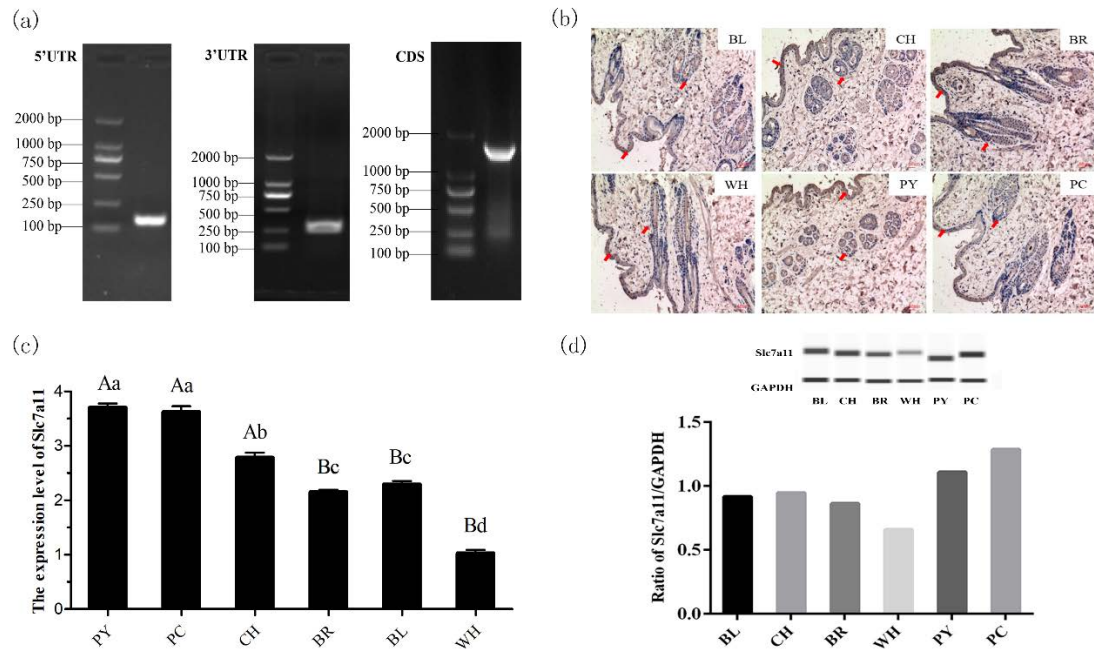

**Fig. 2. Cloning of rabbit *Slc7a11* gene and its expression in Rex Rabbit coat with different fur colors.**

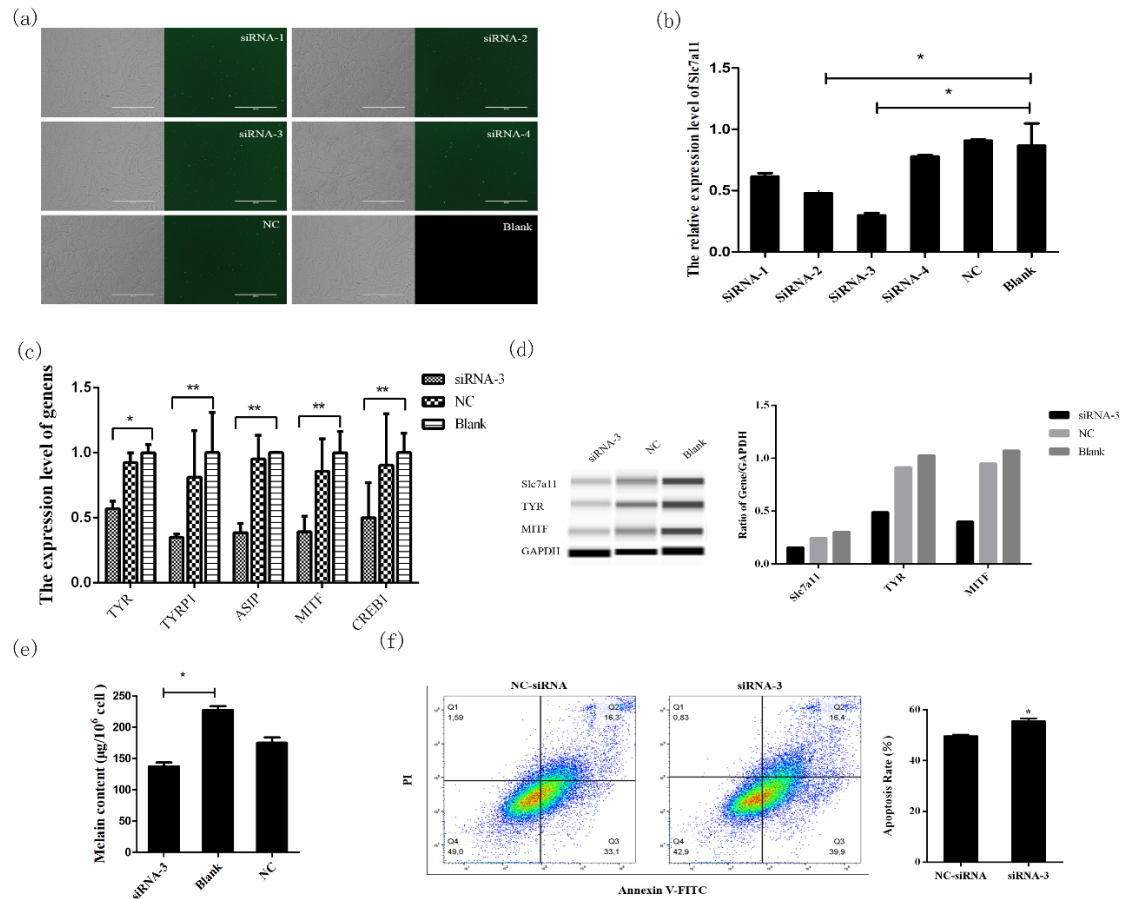

**Fig. 3. Melanogenesis-related gene expression and melanogenesis were inhibited by Slc7a11 knockdown.**



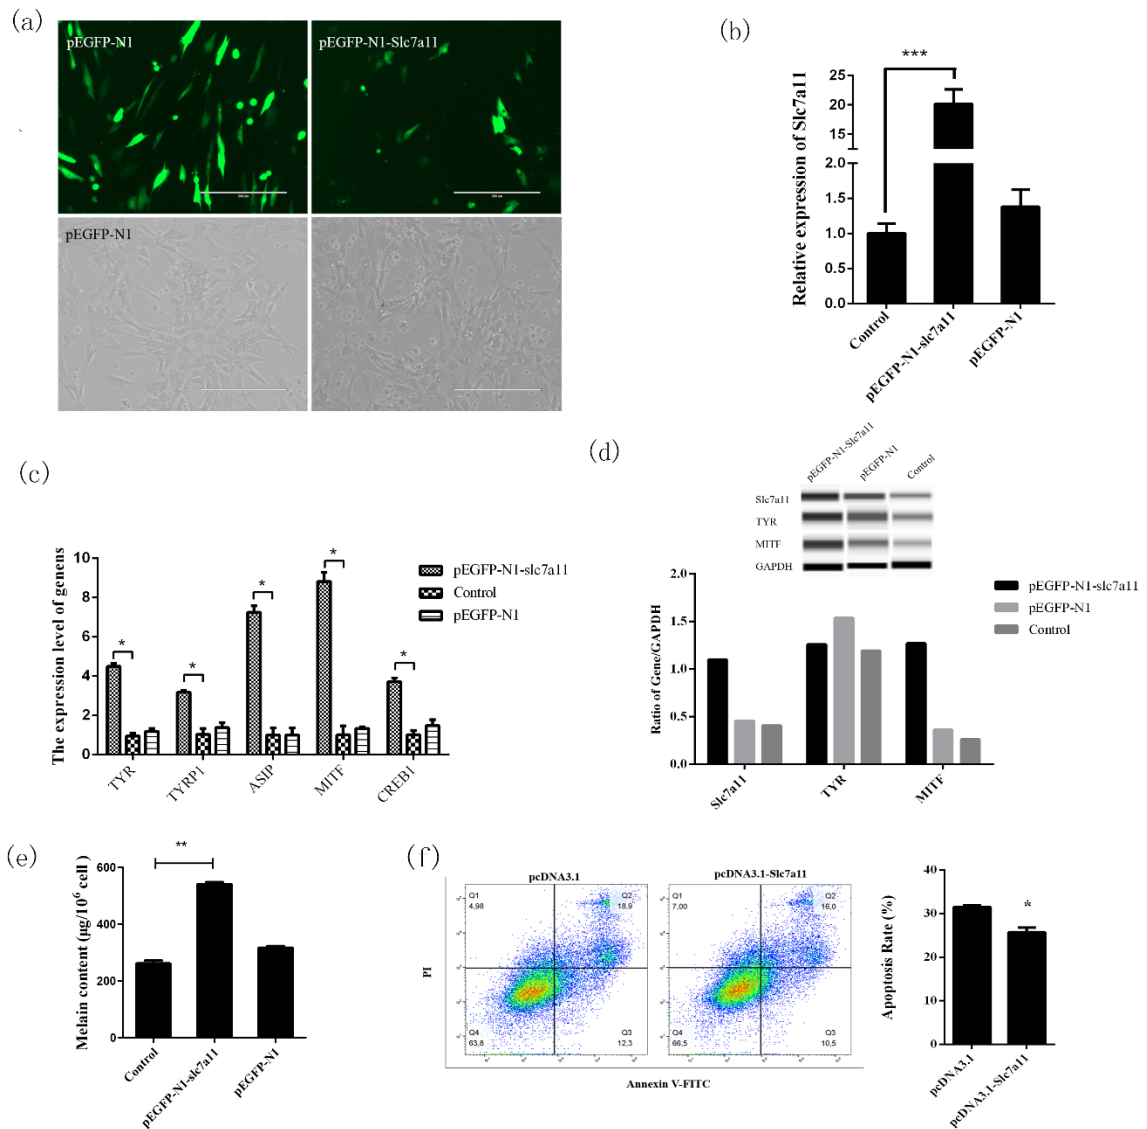

**Fig. 4. The expression of melanogenesis-related genes and melanogenesis were increased by the overexpression of Slc7a11.**

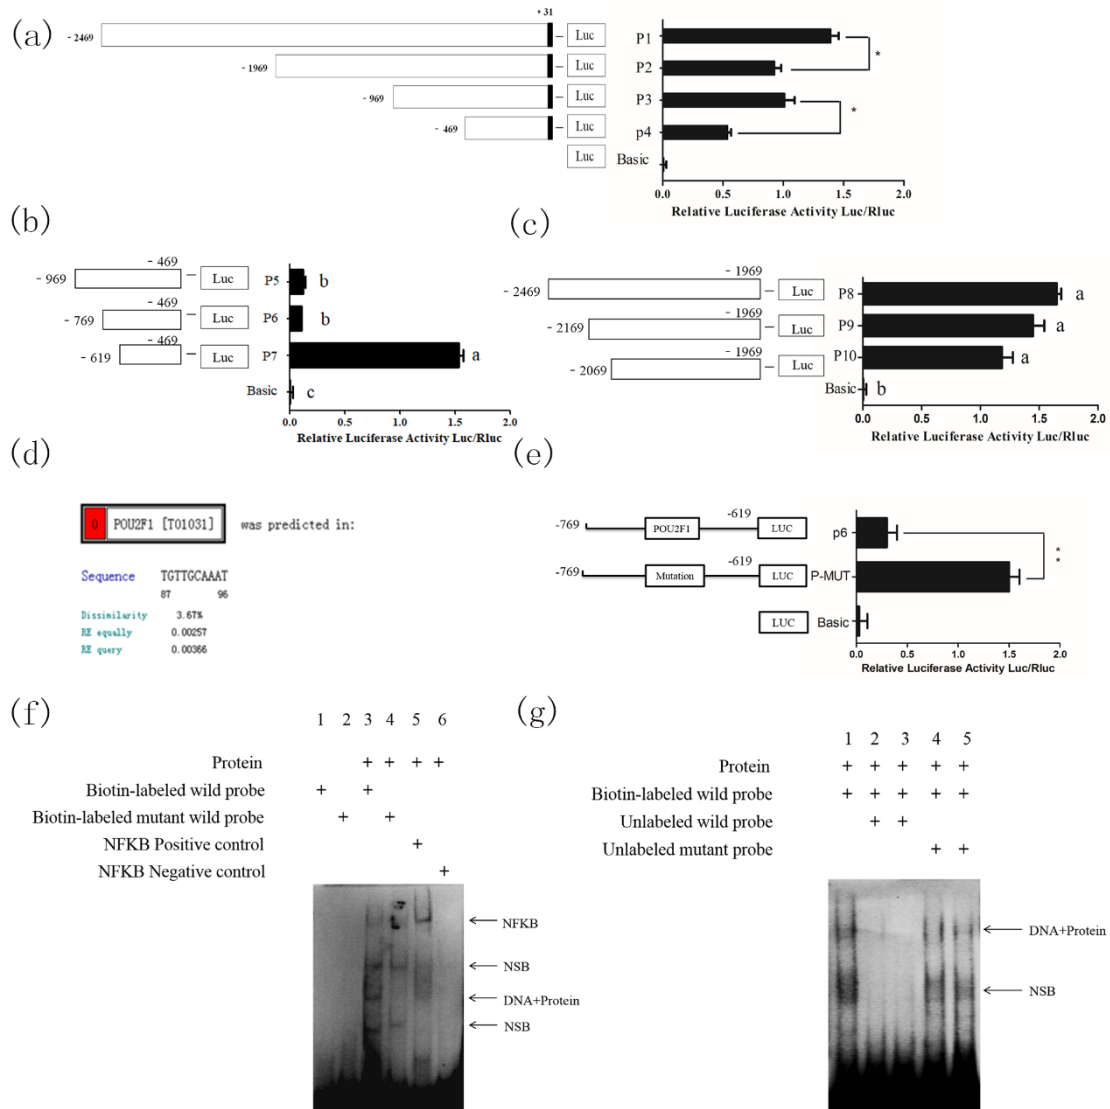

**Fig. 5. Regulation of transcriptional factor POU2F1 on *Slc7a11* promoter activity.**
